# Supplementary material for: Predictors of Contemporary under-5 Child Mortality in Low- and Middle-Income Countries: A Machine Learning Approach
Source: Int J Environ Res Public Health. 2021 Feb 1;18(3):1315. doi: 10.3390/ijerph18031315 (PMC7908191; doi:10.3390/ijerph18031315)
Supplement: Supplementary file 1 [file ijerph-18-01315-s001.pdf]

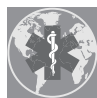

Article

# Predictors of Contemporary under-5 Child Mortality in Low- and Middle-Income Countries: A Machine Learning Approach - Supplementary Material

Andrea Bizzego <sup>1</sup>, Giulio Gabrieli <sup>2</sup>, Marc H. Bornstein <sup>3,4,5</sup>, Kirby Deater-Deckard <sup>6</sup>, Jennifer E. Lansford <sup>7</sup>, Robert H. Bradley <sup>8</sup>, Megan Costa <sup>8</sup> and Gianluca Esposito <sup>1,2,9,\*</sup>

<sup>1</sup> Department of Psychology and Cognitive Science, University of Trento, Rovereto, 38068, Italy; andrea.bizzego@unitn.it

<sup>2</sup> School of Social Sciences, Nanyang Technological University, Singapore, 639798, Singapore; GIULIO001@e.ntu.edu.sg

<sup>3</sup> Eunice Kennedy Shriver National Institute of Child Health and Human Development, Bethesda, MD, 20892, USA; marc.h.bornstein@gmail.com

<sup>4</sup> Institute for Fiscal Studies, London, WC1E 7AE, UK

<sup>5</sup> UNICEF, New York, NY, 10038, USA

<sup>6</sup> University of Massachusetts Amherst, Amherst, MA, 01003, USA; kdeaterdeck@umass.edu

<sup>7</sup> Sanford School of Public Policy, Duke University, Durham, NC, 27708, USA; lansford@duke.edu

<sup>8</sup> T. Denny Sanford School of Social and Family Dynamics, Arizona State University, Tempe, AZ, 85287, USA; robert.bradley@asu.edu (R.H.B.); mecosta@asu.edu (M.C.)

<sup>9</sup> Lee Kong Chian School of Medicine, Nanyang Technological University, Singapore, 636921, Singapore

\* Correspondence: gianluca.esposito@ntu.edu.sg or gianluca.esposito@unitn.it

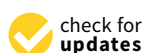

**Citation:** Bizzego, A.; Gabrieli, G.; Bornstein, M.H.; Deater-Deckard, K.; Lansford, J.E.; Bradley, R.H.; Costa, M.; Esposito, G. Predictors of Contemporary under-5 Child Mortality in Low- and Middle-Income Countries: A Machine Learning Approach - Supplementary Material. *Int. J. Environ. Res. Public Health* **2021**, *1*, 0. <https://doi.org/>

Academic Editor: Keun Ho Ryu

Received:

Accepted:

Published:

**Abstract:** Child Mortality (CM) is a worldwide concern, annually affecting as many as 6.81% children in low- and middle-income countries (LMIC). We used data of the Multiple Indicators Cluster Survey (MICS) (N = 275,160) from 27 LMIC and a machine-learning approach to rank 37 distal causes of CM and identify the top 10 causes in terms of predictive potency. Based on the top 10 causes, we identified households with improved conditions. We retrospectively validated the results by investigating the association between variations of CM and variations of the percentage of households with improved conditions at country-level, between the 2005–2007 and the 2013–2017 administrations of the MICS. A unique contribution of our approach is to identify lesser-known distal causes which likely account for better-known proximal causes: notably, the identified distal causes and preventable and treatable through social, educational, and physical interventions. We demonstrate how machine learning can be used to obtain operational information from big dataset to guide interventions and policy makers.

**Keywords:** child development; child mortality; machine learning; education; big data

**Publisher's Note:** MDPI stays neutral with regard to jurisdictional claims in published maps and institutional affiliations.

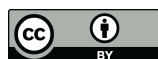

**Copyright:** © 2021 by the authors. Licensee MDPI, Basel, Switzerland. This article is an open access article distributed under the terms and conditions of the Creative Commons Attribution (CC BY) license (<https://creativecommons.org/licenses/by/4.0/>).

## 1. MICS

### 1.1. MICS sampling

The selection of the target households follows a three-stages process. The first-stage, or primary sampling units, is defined, if possible, as census enumeration areas. The second stage is the selection of segments. The third stage is the selection of the particular households within each segment that are interviewed in the survey. Two countries are present in both 2009–2013 and 2013–2017 MICS administrations (MICS rounds 4 and 5): Sudan and Swaziland. As the households are randomly sampled in both rounds, we deemed that the two rounds sample different households and kept both occurrences in the dataset.

### 1.2. MICS structure

The MICS questionnaire is divided into modules. In this study we used data from 3 modules:

- Household module (HH): household characteristics and equipment;
- Women module (WM): woman's instruction, health, wealth, domestic violence, use of substances;
- Birth/death module (BH): birth and death of the children of the household.

Of the 106 countries available in rounds 4 and 5 of MICS, 55 did not provide the BH module. Consequently, these 55 countries were excluded from the study. To join the data of the three modules we created specific data keys:

- HHID: Household ID, unique identifier of the household. HHID is derived as a composition of the following indicators: [MICSround]\_[Country]\_[HH1]\_[HH2], where HH1 is the identifier of the cluster and HH2 is the identifier of the household within the cluster. The HHID key is computed for each module;
- HLID: House line ID, unique identifier of a subject. HLID is derived as a composition of [HHID]\_[subID], where subID is the indicator that identifies the respondent or the subject of the question: LN in WM, BH8 in BH). The HLID key is computed on all modules, with exception of HH;
- MOID: Mother ID, unique identifier of the mother of the child in the BH module. MOID is therefore computed only on BH and derived as a composition of [HHID]\_[LN].

## 2. Data Processing

### 2.1. Selection of indicators and mothers

Not all the MICS indicators are available for all samples. Therefore, we had to shortlist the indicators to maximize the number of available samples and informativeness of the dataset. We manually selected 120 indicators from two MICS modules: HH and WM. The list of the 120 indicators is presented in Supplementary Table 1.

In particular, from HH we selected indicators associated with presence of home equipment (e.g. presence of a refrigerator in the household) or household characteristics (e.g. number of members living in the household). From WM we selected female respondents' demographic characteristics (e.g. if she ever attended school), health and behaviour (e.g. use of substances), and social role (e.g. questions about domestic violence). We selected only the datapoints associated with mothers. To this aim, we first obtained the HLIDs of all the mothers, which are the unique values of the MOID key of the BH module. The HLIDs of the mothers are used to select the data in the WM and HH modules. Then, we joined the WM and HH data using the shared key HHID.

We categorized mothers into two classes: a) noU5D: mothers with no child deceased before the age of 5 years and b) U5D: mothers with at least one child who died before the age of 5 years. More specifically, we computed the age at death of each deceased child in BH; if the age at death of child was below 5 years the corresponding mother was categorized as U5D.

### 2.2. Data Parsing and Imputation

From the original 120 indicators, 20 were multiple choice answers to five different questions. These 20 indicators were therefore transformed into 5 categorical indicators representing the choice for each question. This operation reduced the number of indicators to 105. Then, there were indicators that were meaningful only in case another question had a specific answer (e.g. "Number of cigarettes smoked in the past 24 hours" is meaningful only for individuals who smoke). When not meaningful, those indicators have been set to a value representing non-defined answers, to avoid considering them as missing data.

The final part of the preliminary data processing was directed at resolving missing data issues. There were two primary reasons for missing data. One source of missing indicators derived from differences in each country's policies (e.g., a country's government might decide not to disclose part of the dataset). The second source was errors in the reporting of the answers (e.g., data losses). We note that the MICS dataset has specific annotations to describe when a

participant refused or was unable to answer a question (Missing/Does not answer), or was unable to provide a correct answer (Does not remember/Does not know). In this study, these cases are not considered as missing data and the given annotation was considered as a specific type of answer.

This strategy to deal with missing data tries to recover the data by applying a missing data imputation algorithm [1,2]. This choice of recovering missing data is motivated by the objective to increase the sample size of the dataset. However, the imputation was not performed if either of the following two criteria applied:

- The datapoint has more than 25% of indicators with missing data. In this case the datapoint is removed from the dataset;
- The indicator has more than 25% of datapoints with missing data. In this case the indicator is removed from the dataset.

In the other cases the missing data are imputed by applying the multivariate imputation algorithm [1,2], as implemented in the scikit-learn Python package (v0.21.2)[3], with default settings. As the algorithm generates the imputed data on a continuous scale, in case of ordinal/nominal indicators we round the values to the nearest integer. The imputation procedure is first applied on each country independently to maintain the country-specific statistical properties of the values of each indicator. As a result, each country has a different number of indicators: either because originally some indicators were not provided, or because some indicators were removed due to a high number of datapoints with missing data. For each indicator, we counted the number of datapoints available: of the 105 selected indicators, only the 38 with more than 200,000 datapoints were kept. The datasets of the countries were then merged; however, a country's dataset was not merged if more than 10 indicators from the target 38 indicators were missing. A second data imputation procedure was then applied on the merged dataset to recover the data of the countries with missing indicators. One indicator (WS9) was removed at this stage due to many missing data.

### 2.3. Results of Preprocessing

The dataset obtained after the preliminary data processing step was completed is composed of 275,160 mothers (Age  $M=32.85$ ;  $SD=8.44$ ) and 37 indicators. 229,405 mothers belong to the class noU5D (Age  $M=32.23$ ;  $SD=8.4$ ) and 45,755 to the class U5D (Age  $M=35.94$ ;  $SD=7.98$ ), from 27 countries. In the following paragraphs we comment on the results of the data imputation procedure. During the country-level missing data imputation (see Supplementary Table 2), 2.49% of the data have been imputed (422,931 values), with an average across countries of 2.65% ( $SD = 2.25\%$ ), with a maximum of 6.9% for Guyana (MICS 5th round).

A second imputation step was performed when the datasets of all the countries were merged. In this second step, 2.52% of the data were imputed (256,721 values) from 27 countries (State of Palestine was not merged due to many missing data). Each region contributed an average of 10,191.1 datapoints ( $SD=7,210.6$ ) with a minimum of 2186 datapoints for Sao Tome and Principe, and a maximum of 32,254 datapoints for Iraq.

## 3. Analytical Plan

### 3.1. Random Forest Model

The predictive model is built on Random Forests (RF) [4], which are particularly suited to work with categorical variables (as MICS indicators are) and provide by design an indication of importance in terms of Mean Decrease Impurity index (MDI)[4]. MDI is a metrics adopted in decision trees classifiers to quantify the importance of a given variable to predict the target. In the scikit-learn[3] implementation of RF used in this study the MDI is given as the ratio of the total impurity of the input dataset, namely: relative MDI (rMDI). Due to unbalance in the number of samples for each mother class (noU5D: 83.4% of the samples; U5D: 16.6% of the samples), we assigned weights to the two classes (noU5D: 0.17; U5D: 0.83) to avoid a training which favours the over-represented class. To evaluate model performance we rely on the Matthews Correlation Coefficient (MCC), which is suited in case of an unbalanced dataset as it is computed from the full confusion matrix of the predictions[5,6].

### 3.2. Model Optimization

Three model parameters are optimized: the number of trees (T), the number of input indicators (K), and the depth of each tree (D). The optimization procedure is accomplished in two steps:

1. In the first step we find the optimal T with a grid search on a set of target values ( $T \in \{10, 50, 100, 500, 1000\}$ ). This first step also returns the overall ranking of all the 37 indicators. The optimal T was 500;
2. In the second step we find the optimal K and D by grid search. D represents the total number of decisions in the tree, and its value should not be greater than the number of input indicators K. As K varies ( $K \in \{1, 2, 3, 4, 5, 7, 8, 11, 14, 18, 23, 29, 37\}$ ) the values searched for D are then set proportionally to the input K:  $D \in \{10\%, 25\%, 50\%, 100\%\} * K$ . Values of

$D \leq 0$  were rejected. The ranking of the indicators from the first step is used to sort the selection of the input indicators, starting from indicators with higher rankings. The optimal K was found to be 29, with an optimal D of 13 (see Supplementary Figure 1).

### 3.3. Data Analysis Plan

The optimization and training of the model were performed following a procedure defined in accordance with the Massive Analysis and Quality Control (MAQC) Society[7]. In this procedure different partitions of the dataset are used to train, validate, and test the model to minimize the overfitting and provide more robust results. In particular, the data analytic plan followed these steps (see Supplementary Figure 2):

1. **First partition of the dataset:** The full dataset ( $D$ ) is split into training ( $D_R$ ) and test ( $D_S$ ) datasets (50% of the samples for  $D_R$  and 50% of the samples for  $D_S$ ), maintaining the stratification of the classes;
2. **10x5-fold CV:** The  $D_R$  is used for the grid-search optimization of the model parameters, within a cross-validation (CV) scheme.  $D_R$  is split again into 5 folds: in turn, one fold is used for validation ( $D_v$ ) and the remaining four for training ( $D_r$ ). The model is trained on  $D_r$  and evaluated on  $D_v$ . The output of a single training-evaluation step is the performance of the model on  $D_v$  ( $MCC_v$ ) and the rMDI of the indicators ( $rMDI_v$ ). This procedure is repeated 10 times, each time changing the 5 fold split. We refer to this procedure as 10x5-CV. For each combination of parameters, the results of the 10x5-CV are: the distribution of model performance, from which we compute the median  $MCC_v$  and 90% studentized bootstrap Confidence Intervals ( $CI_{50\%}$ ), and the 50 lists of importance of the indicators, which we transform into rankings and merge into one list of indicator importance (B) by applying the Borda count algorithm [8];
3. **Model selection:** The 10x5-CV is repeatedly applied for each combination of model parameters ( $n_{T_i}, d_i$ ). The set of parameters with the higher median  $MCC_v$  and the respective indicator importance B are selected;
4. **Model training and test:** The final predictive model is set with the optimal parameters, trained on  $D_R$  and evaluated on  $D_S$ . The outputs are the performance on  $D_R$  ( $MCC_{training}$ ) and on  $D_S$  ( $MCC_{test}$ ).

This data analytic plan serves two main purposes:

1. **Stability:** the evaluation of the model performance and the computation of the importance of the indicators is performed multiple times on different partitions of the dataset. Thus, possible biases or variability in the performance which would affect the reliability of the results can be evidenced;
2. **Reproducibility:** the predictive performance of the model is evaluated on independent datasets: first on  $D_v$  (within the 10x5-fold CV), then on  $D_S$  to ensure that the results generalize to the population described by the datasets. Major differences in performance would give evidence that the training procedure is biased and, therefore, the results are not reproducible.

### 3.4. Predictive Confirmation of MICS Indicators in Reducing Under-5 Child Mortality

We estimated the efficacy of interventions targeting the identified distal causes on the reduction of CM. The outcome of each MICS indicator was recoded into a binary score: high and low quality; the recoding was based on the differences in the distributions between U5D and noU5D classes. Indicators derived from the Woman Questionnaire refer to women, while indicators derived from the Household Questionnaire refer to households.

For each MICS indicator, we computed the percentage of datapoints (women or households) with a high quality score in each country. The relative difference of the percentage between the MICS5 (or MICS4 depending on the country) and MICS3 was used to estimate the overall improvement of the indicator  $i$  ( $P_i$ ):  $P_i = \frac{\%_{iMICS5} - \%_{iMICS3}}{\%_{iMICS3}}$ . Then we computed the difference in the percentage of CM between the years corresponding to MICS5 and MICS3.

Seven countries, of those considered in this study, were included in both MICS rounds and were used. However, Guinea-Bissau is an outlier in several distal cases and is excluded from the following explorative analysis. Notably, Guinea-Bissau it is also the country with the greatest improvement in CM (-4.45%).

A linear model was fit to investigate the relationship between the improvement of each indicator and reduction of CM (see Figure 3). Negative coefficients were found for six indicators, three with a significant association. The exceptions are mainly associated with indicators of the "Household Composition", which are also characterized by minor improvements.

We then grouped the distal causes into the three groups: "Mother Age & Head Education" ("Age of Woman" and "Education Level of HH head"), "Home Environment" ("Wealth Index", "Fuel used for cooking", "Type of Toilet Facility", "Source of Water used for Drinking", "Refrigerator in the HH") and "Household Composition" ("Number of HH Members",

"Children Living With the mother", "Children Not Living With the mother"). The improvement of each group was estimated by computing the average improvement across the indicators composing the group.

The efficacy of the intervention for each group was estimated with a linear model between the improvement for each group and the variation in CM. A robust regression [9] was used to mitigate the effect of the outlier (Guinea-Bissau).

#### 4. Machine Learning Results

We observed a weak over-fitting effect ( $MCC_{training} > MCC_{test}$ ), which indicates that the model is partially learning some patterns in the data that are proper for the particular partition of the dataset used for training ( $D_R$ ) and not of the general population. To ensure that it is not a symptom of any major flaws in the model, we trained a new model on a copy of  $D_R$  where the classes of the samples have been randomly shuffled and evaluated the fooled model on  $D_S$ . Since obtaining performances very different from 0 ( $MCC=0$  is the performance of a random classifier) would immediately evidence the presence of major issues in the model (e.g. biases, batch effects), this diagnostic test is common in any rigorous ML analysis. We obtained an  $MCC_{fooled} = -0.017$ , which ensures that, except for the slight over-fitting, the model does not present any major flaws.

We used a robust machine learning framework derived from bio-informatics applications for bio-marker discovery. Our data analytic plan assessed the stability of the model; thus, we have increased assurance regarding the importance and independence of the predictors of CM. The framework was used to more precisely delineate and rank distal predictors of CM.

##### 4.1. Correlation of the predictors

We investigated the pairwise correlation between the top 29 predictors (Supplementary Figure 4; then we investigated the correlation between the top 29 predictors with the target outcome (Supplementary Table 3). As we are dealing with different types of variables, different correlation metrics were used:

- Spearman correlation: between variables that were interval or ordinal;
- Correlation ratio: between nominal and interval variables;
- Point biserial: between interval and dichotomous variables;
- Phi coefficient: between dichotomous variables;
- Cramer's V in all other cases.

Bonferroni's correction was adopted to account for multiple hypotheses. The higher correlation in the top 10 predictors is between HC8E ("Refrigerator in the household") and HC6 ("Type of fuel used for cooking", correlation ratio = 0.68) and WS8 ("Type of toilet facility", correlation ratio = 0.58). HC6 and WS8 also have the higher correlation with the U5CM categories: the correlation ratio between HC6 and U5CM is 0.2, and between WS8 and U5CM is 0.2.

A

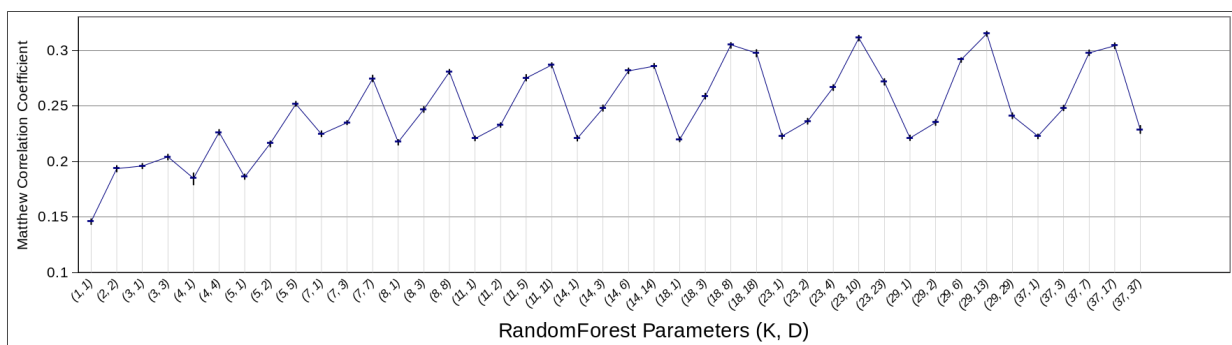

B

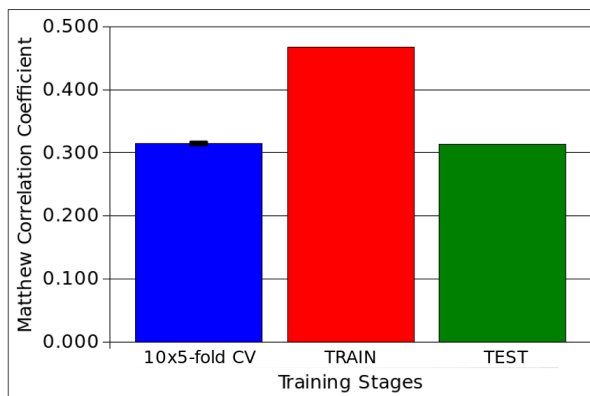

C

|            | Predicted    |              | Class Acc [%] |
|------------|--------------|--------------|---------------|
|            | noUSD        | USD          |               |
| True noUSD | <b>90924</b> | 23778        | 79.27         |
| True USD   | 9597         | <b>13281</b> | 58.05         |

**Figure 1.** Predictive performances of the trained Random Forest model. A: Median MCCv and 90% studentized CI for each combination of parameters (K,D); B: Model performances for the 10x5-fold CV (best parameter set), on  $D_R$  (TRAIN) and on  $D_S$  (TEST); C: Confusion Matrix on  $D_S$ .

Table 1: Pool of the 120 indicators selected from the MICS datasets.

| Acronym | Description                                                             | Acronym  | Description                                                              |
|---------|-------------------------------------------------------------------------|----------|--------------------------------------------------------------------------|
| HH6     | Area                                                                    | HHSEX    | Sex of household head                                                    |
| HH11    | Number of HH members                                                    | wscore   | Combined wealth score                                                    |
| HH12    | Number of women 15 - 49 years                                           | windex5  | Wealth index quintile                                                    |
| HH13A   | Number of men age 15-49                                                 | hHighELE | Education of household head                                              |
| HH14    | Number of children under age 5                                          | WB2      | Age of woman                                                             |
| CD3A    | Took away privileges                                                    | WB3      | Ever attended school                                                     |
| CD3B    | Explained why behaviour was wrong                                       | WB4      | Highest level of school attended                                         |
| CD3C    | Shook child                                                             | WB7      | Can read part of the sentence                                            |
| CD3D    | Shouted, yelled or screamed at child                                    | MT2      | Frequency of reading newspaper or magazine                               |
| CD3E    | Gave child something else to do                                         | MT3      | Frequency of listening to the radio                                      |
| CD3F    | Spanked, hit or slapped child on bottom with bare hand                  | MT4      | Frequency of watching TV                                                 |
| CD3G    | Hit child on the bottom or elsewhere with belt, hair-brush, stick, etc. | MT6      | Ever used a computer                                                     |
| CD3H    | Called child dumb, lazy or another name                                 | MT7      | Computer usage in the last 12 months                                     |
| CD3I    | Hit or slapped child on the face, head or ears                          | MT8      | Frequency of computer usage in the last month                            |
| CD3J    | Hit or slapped child on the hand, arm or leg                            | MT9      | Ever used internet                                                       |
| CD3K    | Beat child up, hit over and over as hard as one could                   | MT10     | Internet usage in the last 12 months                                     |
| CD4     | Child needs to be physically punished to be brought up properly         | MT11     | Frequency of Internet usage in the past month                            |
| HC6     | Type of fuel using for cooking                                          | cm3      | Completed years since first birth                                        |
| HC7     | Cooking location                                                        | CM4      | Any sons or daughters living with you                                    |
| HC8A    | Electricity                                                             | CM6      | Any sons or daughters not living with you                                |
| HC8B    | Radio                                                                   | DB2      | Wanted child later or did not want more children                         |
| HC8C    | Television                                                              | CP2A     | Ever used a method to avoid pregnancy                                    |
| HC8D    | Landline Telephone                                                      | DV1A     | If she goes out with out telling husband: wife beating justified         |
| HC8E    | Refrigerator                                                            | DV1B     | If she neglects the children: wife beating justified                     |
| HC9A    | Watch                                                                   | DV1C     | If she argues with husband: wife beating justified                       |
| HC9B    | Mobile telephone                                                        | DV1D     | If she refuses sex with husband: wife beating justified                  |
| HC9C    | Bicycle                                                                 | DV1E     | If she burns the food: wife beating justified                            |
| HC9D    | Motorcycle or scooter                                                   | DV1F     | If she neglects housework: wife beating justified                        |
| HC9E    | Cattle/Donkey/Horse Cart                                                | MA6      | Marital status                                                           |
| HC9F    | Car or truck                                                            | MA9      | Age at first union                                                       |
| HC9G    | Boat with motor                                                         | SB1      | Age at first sexual intercourse                                          |
| HC10    | Household owns the dwelling                                             | TA1      | Ever tried cigarette smoking                                             |
| HC12    | Hectares of agricultural land members of household owns                 | TA2      | Age when cigarette was smoked for the first time                         |
| HC13    | Household own any animals                                               | TA3      | Currently smoking cigarettes                                             |
| HC15    | Any household member own bank account                                   | TA4      | Number of cigarettes smoked in the last 24 hours                         |
| WS1     | Main source of drinking water                                           | TA5      | Number of days when cigarettes were smoked in past month                 |
| WS3     | Location of the water source                                            | TA6      | Ever tried any smoked tobacco products other than cigarettes             |
| WS6     | Treat water to make safer for drinking                                  | TA7      | Used any smoked tobacco products during the last month                   |
| WS7A    | Water treatment: Boil                                                   | TA9      | Number of days when tobacco products where smoked in past month          |
| WS7B    | Water treatment: Add bleach/chlorine                                    | TA10     | Ever tried any form of smokeless tobacco products                        |
| WS7C    | Water treatment: Strain it through a cloth                              | TA11     | Used any smokeless tobacco products during the last month                |
| WS7D    | Water treatment: Use water filter                                       | TA13     | Number of days when smokeless tobacco products where used in past month  |
| WS7E    | Water treatment: Solar disinfection                                     | TA14     | Ever drunk alcohol                                                       |
| WS7F    | Water treatment: Let it stand and settle                                | TA15     | Age when alcohol was used for the first time                             |
| WS7X    | Water treatment: Other                                                  | TA16     | Number of days when at least one drink of alcohol was used in past month |
| WS7Z    | Water treatment: DK                                                     | TA17     | Number of drinks usually consumed                                        |
| WS8     | Type of toilet facility                                                 | LS2      | Estimation of overall happiness                                          |
| WS9     | Toilet facility shared                                                  | LS3      | Satisfaction with family life                                            |
| HW1     | Place where household members most often wash their hands               | LS4      | Satisfaction with friendships                                            |
| HW2     | Water available at the place for handwashing                            | LS5      | School attendance during the current school year                         |
| HW3A    | Soap or detergent present at place of handwashing                       | LS6      | Satisfaction with school                                                 |
| HW3BA   | Bar soap                                                                | LS7      | Satisfaction with current job                                            |
| HW3BB   | Detergent (Powder / Liquid / Paste)                                     | LS8      | Satisfaction with health                                                 |
| HW3BC   | Liquid soap                                                             | LS9      | Satisfaction with current residence                                      |
| HW3BD   | Ash / Mud / Sand                                                        | LS10     | Satisfaction with treatment by other people                              |
| HW5A    | Soap/other material available for washing hands                         | LS11     | Satisfaction with appearance                                             |
| HW5BA   | Bar soap                                                                | LS12     | Satisfaction with life overall                                           |
| HW5BB   | Detergent (Powder / Liquid / Paste)                                     | LS13     | Satisfaction with current income                                         |
| HW5BC   | Liquid soap                                                             | LS14     | Life satisfaction in comparison with last year                           |
| HW5BD   | Ash / Mud / Sand                                                        | LS15     | Life satisfaction expectation one year from now                          |

Table 2: Summary of the by-country data imputation step. <sup>a</sup>: Percentage of values

| Country               | Round | Removed | Imputed <sup>a</sup> | Result   |             |
|-----------------------|-------|---------|----------------------|----------|-------------|
|                       |       |         |                      | #Mothers | #Indicators |
| Ghana                 | 4     | 0       | 0.99                 | 7696     | 40          |
| Iraq                  | 4     | 0       | 0.16                 | 32254    | 72          |
| Lao PDR               | 4     | 0       | 1.19                 | 16119    | 45          |
| Algeria               | 4     | 0       | 0.31                 | 17636    | 45          |
| Mauritania            | 4     | 0       | 0.41                 | 8169     | 43          |
| Moldova               | 4     | 0       | 0.57                 | 4123     | 74          |
| South Sudan           | 4     | 0       | 0.07                 | 7322     | 62          |
| Sudan                 | 4     | 0       | 0.21                 | 10839    | 75          |
| Swaziland             | 4     | 0       | 0.57                 | 3291     | 76          |
| Tunisia               | 4     | 0       | 1.33                 | 4479     | 74          |
| Ukraine               | 4     | 0       | 1.90                 | 6479     | 39          |
| Cameroon              | 5     | 12      | 4.19                 | 7071     | 74          |
| Dominican Republic    | 5     | 426     | 4.52                 | 22708    | 73          |
| El Salvador           | 5     | 6       | 5.71                 | 10029    | 73          |
| Guinea Bissau         | 5     | 9       | 4.86                 | 7523     | 59          |
| Guyana                | 5     | 87      | 6.90                 | 3690     | 53          |
| Kosovo                | 5     | 0       | 0.40                 | 3069     | 53          |
| Kyrgyzstan            | 5     | 62      | 3.82                 | 4986     | 80          |
| Malawi                | 5     | 23      | 3.28                 | 18938    | 74          |
| Mali                  | 5     | 0       | 1.09                 | 13980    | 59          |
| Mongolia              | 5     | 0       | 2.85                 | 9838     | 41          |
| Nepal                 | 5     | 332     | 5.83                 | 9630     | 74          |
| Paraguay              | 5     | 129     | 6.64                 | 5369     | 54          |
| Sao Tome and Principe | 5     | 4       | 5.01                 | 2186     | 45          |
| State of Palestine    | 5     | 681     | 0.03                 | 6799     | 41          |
| Sudan                 | 5     | 131     | 3.50                 | 11585    | 54          |
| Swaziland             | 5     | 17      | 2.54                 | 3276     | 88          |
| Turkmenistan          | 5     | 3       | 5.18                 | 4930     | 54          |
| Uruguay               | 5     | 0       | 0.67                 | 7101     | 41          |
| Vietnam               | 5     | 7       | 4.90                 | 10844    | 42          |

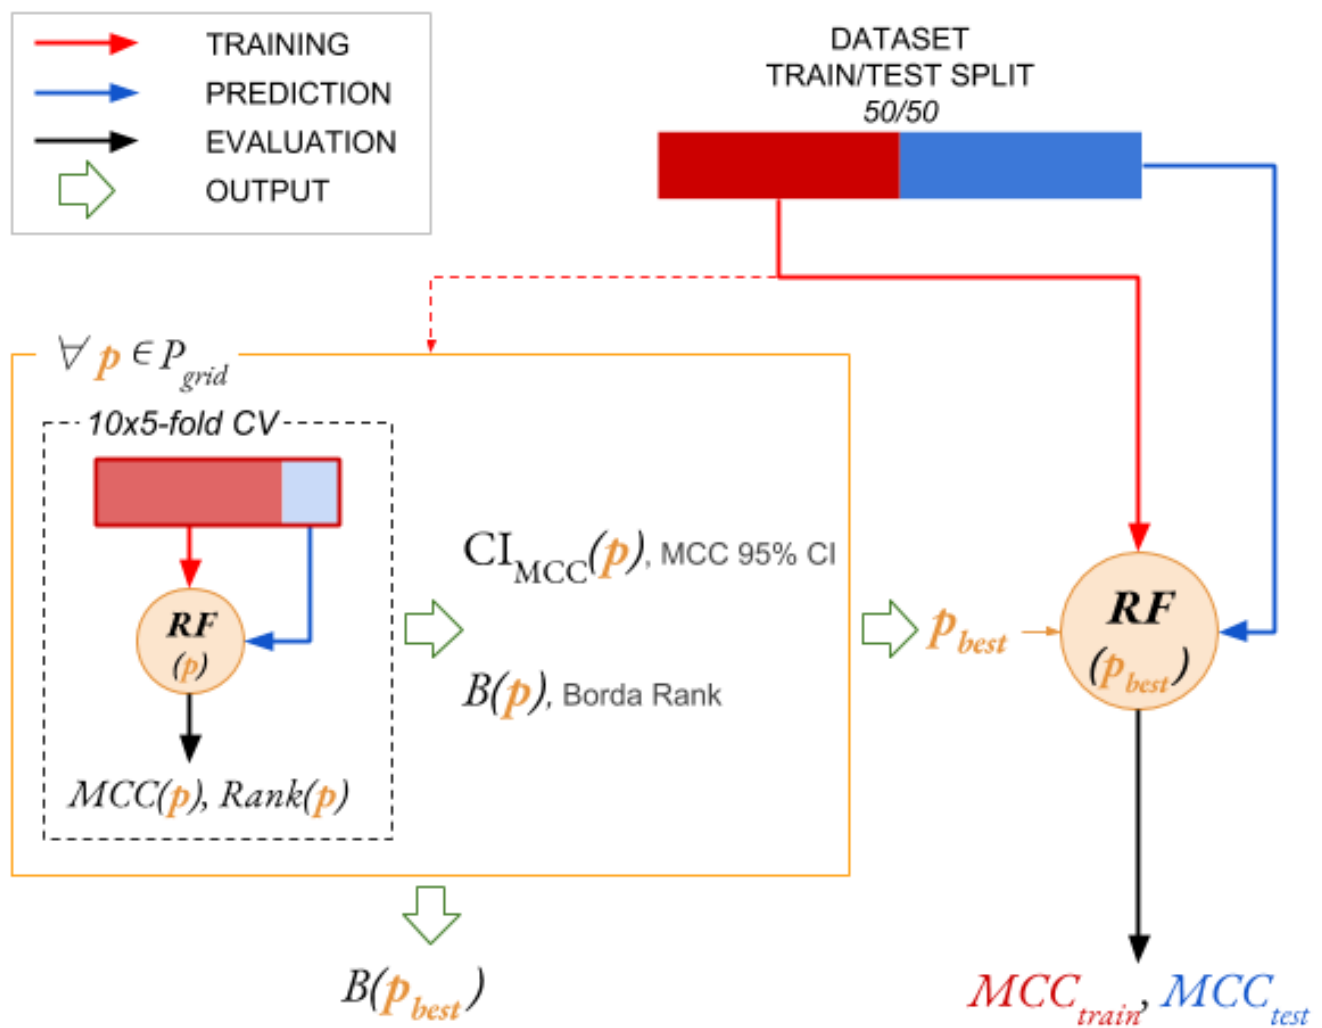

**Figure 2.** Schematic representation of the Data Analysis Plan.

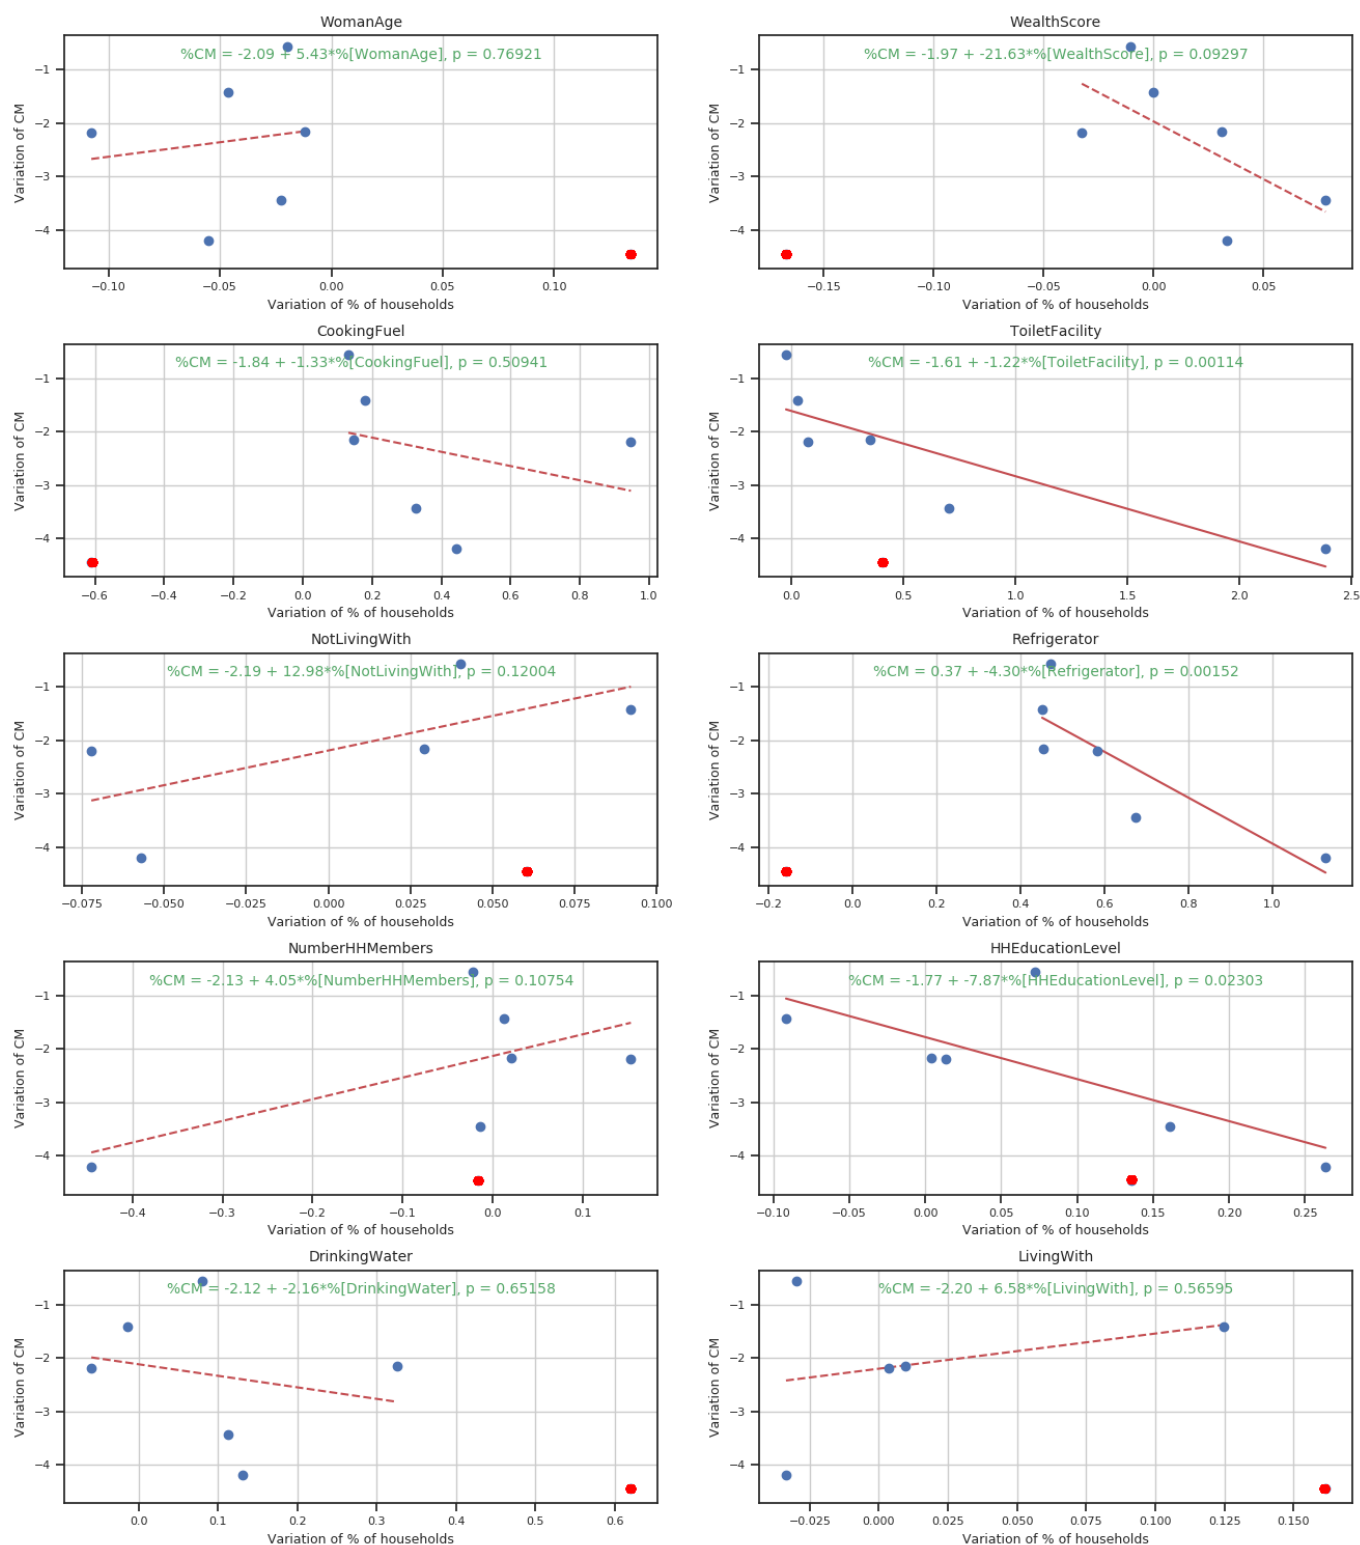

**Figure 3.** Association between the improvement of each MICS indicator cause and CM. The red dot indicates Guinea-Bissau, which was not used to estimate the linear models.

| Rank | Acronym | Description                   | Variable Type | WB2 | wscore | HC6                 | WS8  | CM6   | HC8E   | HH11  | hHighEL                                                        | WS1  | CM4   | WB3   | HW1  | HC8A  | HH14  | HC8C  | windex5 | HH12  | DV1D  | HC13  | HC10  | HH6   | DV1B  | DV1C  | DV1A  | WS6   | HC8B  | HHSEX | HC9C  | HC9A  |      |
|------|---------|-------------------------------|---------------|-----|--------|---------------------|------|-------|--------|-------|----------------------------------------------------------------|------|-------|-------|------|-------|-------|-------|---------|-------|-------|-------|-------|-------|-------|-------|-------|-------|-------|-------|-------|-------|------|
| 1    | WB2     | Age of woman                  | interval      |     | 0.08   | -0.07               | 0.13 | -0.42 | -0.15  | 0.03  | 0.06                                                           | 0.12 | 0.07  | 0.07  | 0.12 | -0.11 | -0.43 | -0.12 | 0.07    | 0.13  | 0.02  | 0.00  | -0.07 | -0.06 | 0.01  | 0.01  | 0.00  | -0.03 | -0.01 | 0.03  | -0.04 | -0.06 |      |
| 2    | wscore  | Wealth index score            | interval      |     |        | -0.45               | 0.43 | 0.05  | -0.43  | -0.07 | 0.40                                                           | 0.48 | 0.03  | -0.28 | 0.17 | -0.40 | -0.12 | -0.42 | 0.94    | 0.08  | 0.13  | 0.32  | 0.22  | -0.51 | 0.13  | 0.14  | 0.14  | -0.05 | -0.22 | 0.02  | -0.14 | -0.37 |      |
| 3    | HC6     | Type of fuel for cooking      | ordinal       |     |        |                     | 0.24 | 0.16  | 0.68   | 0.15  | -0.38                                                          | 0.30 | 0.08  | 0.32  | 0.17 | 0.63  | 0.11  | 0.61  | -0.32   | 0.01  | 0.15  | 0.45  | 0.28  | 0.50  | 0.16  | 0.12  | 0.14  | 0.13  | 0.09  | 0.07  | 0.08  | 0.29  |      |
| 4    | WS8     | Type of toilet facility       | nominal       |     |        |                     |      | 0.13  | 0.58   | 0.22  | 0.23                                                           | 0.22 | 0.04  | 0.28  | 0.16 | 0.64  | 0.20  | 0.57  | 0.19    | 0.12  | 0.18  | 0.40  | 0.19  | 0.47  | 0.15  | 0.13  | 0.15  | 0.09  | 0.09  | 0.08  | 0.12  | 0.28  |      |
| 5    | CM6     | Children not living with you  | dico          |     |        |                     |      |       | -0.12  | 0.05  | 0.07                                                           | 0.14 | -0.30 | -0.08 | 0.11 | -0.11 | 0.16  | -0.10 | 0.04    | -0.05 | 0.00  | 0.10  | 0.01  | -0.07 | -0.01 | 0.00  | -0.02 | 0.01  | 0.03  | -0.07 | -0.01 | -0.06 |      |
| 6    | HC8E    | Refrigerator                  | dico          |     |        |                     |      |       |        | 0.09  | 0.42                                                           | 0.63 | 0.03  | 0.32  | 0.50 | 0.67  | 0.14  | 0.68  | 0.35    | -0.02 | -0.11 | -0.32 | -0.09 | 0.40  | -0.10 | -0.08 | -0.08 | 0.03  | 0.01  | 0.02  | 0.04  | 0.29  |      |
| 7    | HH11    | Number of HH members          | interval      |     |        |                     |      |       |        |       | -0.30                                                          | 0.21 | -0.12 | 0.24  | 0.15 | 0.09  | 0.44  | 0.06  | -0.06   | 0.57  | -0.23 | -0.19 | -0.16 | 0.11  | -0.17 | -0.17 | -0.21 | 0.03  | -0.10 | -0.16 | -0.12 | -0.10 |      |
| 8    | hHighEL | Education of HH head          | ordinal       |     |        |                     |      |       |        |       |                                                                | 0.24 | 0.03  | 0.54  | 0.17 | 0.38  | -0.18 | 0.39  | 0.37    | -0.13 | 0.24  | 0.23  | 0.17  | 0.31  | 0.20  | 0.20  | 0.23  | 0.13  | 0.03  | 0.04  | 0.06  | 0.19  |      |
| 9    | WS1     | Main source of drinking water | nominal       |     |        |                     |      |       |        |       |                                                                |      | 0.05  | 0.33  | 0.15 | 0.61  | 0.18  | 0.57  | 0.22    | 0.11  | 0.23  | 0.43  | 0.28  | 0.52  | 0.20  | 0.22  | 0.22  | 0.25  | 0.14  | 0.11  | 0.20  | 0.27  |      |
| 10   | CM4     | Children living with you      | dico          |     |        |                     |      |       |        |       |                                                                |      |       | -0.03 | 0.04 | 0.02  | -0.15 | 0.02  | 0.04    | -0.01 | 0.03  | 0.00  | 0.05  | -0.01 | 0.03  | 0.03  | 0.04  | -0.01 | -0.02 | 0.08  | 0.05  | 0.01  |      |
| 11   | WB3     | Ever attended school          | dico          |     |        |                     |      |       |        |       |                                                                |      |       |       | 0.23 | 0.31  | 0.15  | 0.33  | 0.27    | 0.12  | -0.27 | -0.18 | -0.13 | 0.23  | -0.23 | -0.23 | -0.27 | 0.09  | 0.02  | -0.08 | 0.02  | 0.06  |      |
| 12   | HW1     | Place for hand washing        | nominal       |     |        |                     |      |       |        |       |                                                                |      |       |       |      | 0.50  | 0.15  | 0.45  | 0.07    | 0.08  | 0.14  | 0.22  | 0.06  | 0.26  | 0.10  | 0.08  | 0.08  | 0.09  | 0.08  | 0.06  | 0.05  | 0.24  |      |
| 13   | HC8A    | Electricity                   | dico          |     |        |                     |      |       |        |       |                                                                |      |       |       |      |       | 0.14  | 0.77  | 0.33    | -0.03 | -0.12 | -0.30 | -0.16 | 0.41  | -0.08 | -0.10 | -0.07 | 0.06  | 0.00  | 0.01  | 0.02  | 0.29  |      |
| 14   | HH14    | #children <5 yrs              | interval      |     |        |                     |      |       |        |       |                                                                |      |       |       |      |       |       | 0.12  | -0.12   | 0.14  | -0.17 | -0.10 | -0.06 | 0.11  | -0.12 | -0.13 | -0.15 | 0.04  | -0.04 | -0.10 | -0.03 | 0.00  |      |
| 15   | HC8C    | Television                    | dico          |     |        |                     |      |       |        |       |                                                                |      |       |       |      |       |       |       | 0.35    | -0.05 | -0.11 | -0.28 | -0.12 | 0.39  | -0.09 | -0.10 | -0.08 | 0.06  | 0.04  | 0.04  | 0.04  | 0.28  |      |
| 16   | windex5 | Wealth index quintiles        | ordinal       |     |        |                     |      |       |        |       |                                                                |      |       |       |      |       |       |       |         | 0.08  | 0.13  | 0.28  | 0.20  | 0.47  | 0.12  | 0.14  | 0.13  | 0.06  | 0.23  | 0.03  | 0.16  | 0.33  |      |
| 17   | HH12    | #women 15 - 49 years          | interval      |     |        |                     |      |       |        |       |                                                                |      |       |       |      |       |       |       |         |       | -0.12 | -0.10 | -0.10 | 0.00  | -0.09 | -0.09 | -0.11 | 0.00  | -0.10 | -0.01 | -0.07 | -0.14 |      |
| 18   | DV1D    | Beat Just: refuses sex        | dico          |     |        |                     |      |       |        |       |                                                                |      |       |       |      |       |       |       |         |       |       | 0.09  | 0.09  | -0.12 | 0.55  | 0.59  | 0.57  | -0.07 | -0.02 | 0.09  | 0.00  | -0.02 |      |
| 19   | HC13    | HH own any animals            | dico          |     |        |                     |      |       |        |       |                                                                |      |       |       |      |       |       |       |         |       |       |       | 0.28  | -0.47 | 0.10  | 0.08  | 0.07  | 0.06  | 0.05  | 0.08  | 0.12  | -0.13 |      |
| 20   | HC10    | HH owns the dwelling          | dico          |     |        |                     |      |       |        |       |                                                                |      |       |       |      |       |       |       |         |       |       |       |       | -0.31 | 0.09  | 0.09  | 0.09  | 0.06  | -0.03 | 0.07  | 0.08  | -0.05 |      |
| 21   | HH6     | Area                          | dico          |     |        |                     |      |       |        |       |                                                                |      |       |       |      |       |       |       |         |       |       |       |       |       | -0.11 | -0.10 | -0.10 | -0.01 | 0.04  | -0.06 | -0.04 | 0.22  |      |
| 22   | DV1B    | Beat Just: neglects children  | dico          |     |        | Type of correlation |      |       | Range  | Pval? | Variable Type                                                  |      |       |       |      |       |       |       |         |       |       |       |       |       |       | 0.59  | 0.68  | -0.05 | -0.05 | 0.08  | -0.01 | -0.01 |      |
| 23   | DV1C    | Beat Just: argues w/ husb.    | dico          |     |        | Spearman            |      |       | [-1:1] | Y     | Both Interval or Ordinal                                       |      |       |       |      |       |       |       |         |       |       |       |       |       |       |       | 0.59  | -0.07 | -0.05 | 0.07  | -0.02 | -0.02 |      |
| 24   | DV1A    | Beat Just: goes out w/o tell  | dico          |     |        | Correlation ratio   |      |       | [0:1]  | N     | Nominal vs Interval                                            |      |       |       |      |       |       |       |         |       |       |       |       |       |       |       |       |       | -0.08 | -0.04 | 0.10  | -0.02 | 0.00 |
| 25   | WS6     | Treat water for drinking      | dico          |     |        | Point Biserial      |      |       | [0:1]  | Y     | Interval vs Dichotomous                                        |      |       |       |      |       |       |       |         |       |       |       |       |       |       |       |       |       |       | -0.04 | 0.01  | 0.05  | 0.00 |
| 26   | HC8B    | Radio                         | dico          |     |        | Cramer's V          |      |       | [0:1]  | N     | Ordinal vs Nominal, Nominal vs Nominal, Nominal vs Dichotomous |      |       |       |      |       |       |       |         |       |       |       |       |       |       |       |       |       | 0.03  | 0.12  | 0.18  |       |      |
| 27   | HHSEX   | Sex of household head         | dico          |     |        | Phi                 |      |       | [-1:1] | N     | Dichotomous vs Dichotomous                                     |      |       |       |      |       |       |       |         |       |       |       |       |       |       |       |       |       |       |       | 0.08  | 0.07  |      |
| 28   | HC9C    | Bicycle                       | dico          |     |        |                     |      |       |        |       |                                                                |      |       |       |      |       |       |       |         |       |       |       |       |       |       |       |       |       |       |       |       |       | 0.08 |

**Figure 4.** Correlations among the top 29 predictors. Colors of cells indicate the type of correlation test used. The top left box indicates the top 10 indicators considered in the validation. Bold numbers indicate correlations with absolute value > 0.1

Table 3: Correlations between the top 29 predictors and the target, <sup>a</sup>: Point Biserial Correlation; <sup>b</sup>: Cramer's V correlation; <sup>c</sup>: Phi correlation.

| Rank | Acronym | Description                   | Variable Type | Correlation        |
|------|---------|-------------------------------|---------------|--------------------|
| 1    | WB2     | Age of woman                  | interval      | 0.16 <sup>a</sup>  |
| 2    | wscore  | Wealth index score            | interval      | -0.11 <sup>a</sup> |
| 3    | HC6     | Type of fuel for cooking      | ordinal       | 0.2 <sup>b</sup>   |
| 4    | WS8     | Type of toilet facility       | nominal       | 0.2 <sup>b</sup>   |
| 5    | CM6     | Children not living with you  | dichotomous   | 0.08 <sup>c</sup>  |
| 6    | HC8E    | Refrigerator                  | dichotomous   | -0.09 <sup>b</sup> |
| 7    | HH11    | Number of HH members          | interval      | 0.07 <sup>a</sup>  |
| 8    | hHighEL | Education of HH head          | ordinal       | 0.16 <sup>b</sup>  |
| 9    | WS1     | Main source of drinking water | nominal       | 0.19 <sup>b</sup>  |
| 10   | CM4     | Children living with you      | dichotomous   | -0.04 <sup>c</sup> |
| 11   | WB3     | Ever attended school          | dichotomous   | -0.08 <sup>c</sup> |
| 12   | HW1     | Place for hand washing        | nominal       | 0.16 <sup>b</sup>  |
| 13   | HC8A    | Electricity                   | dichotomous   | -0.09 <sup>c</sup> |
| 14   | HH14    | Number of children < 5 years  | interval      | -0.01 <sup>a</sup> |
| 15   | HC8C    | Television                    | dichotomous   | -0.09 <sup>c</sup> |
| 16   | windex5 | Wealth index quintiles        | ordinal       | 0.1 <sup>b</sup>   |
| 17   | HH12    | Number of women 15 - 49 years | interval      | 0.03 <sup>a</sup>  |
| 18   | DV1D    | Beat Just: refuses sex        | dichotomous   | 0.04 <sup>c</sup>  |
| 19   | HC13    | HH own any animals            | dichotomous   | 0.06 <sup>c</sup>  |
| 20   | HC10    | HH owns the dwelling          | dichotomous   | 0.03 <sup>c</sup>  |
| 21   | HH6     | Area                          | dichotomous   | -0.06 <sup>c</sup> |
| 22   | DV1B    | Beat Just: neglects children  | dichotomous   | 0.04 <sup>c</sup>  |
| 23   | DV1C    | Beat Just: argues w/ husband  | dichotomous   | 0.03 <sup>c</sup>  |
| 24   | DV1A    | Beat Just: goes out w/o tell  | dichotomous   | 0.03 <sup>c</sup>  |
| 25   | WS6     | Treat water for drinking      | dichotomous   | 0 <sup>c</sup>     |
| 26   | HC8B    | Radio                         | dichotomous   | 0 <sup>c</sup>     |
| 27   | HHSEX   | Sex of household head         | dichotomous   | 0.01 <sup>c</sup>  |
| 28   | HC9C    | Bicycle                       | dichotomous   | 0.01 <sup>c</sup>  |
| 29   | HC9A    | Watch                         | dichotomous   | -0.04 <sup>c</sup> |

## References

1. Zhang, Z. Multiple imputation with multivariate imputation by chained equation (MICE) package. *Annals of Translational Medicine* **2016**, *4*.
2. Buck, S.F. A method of estimation of missing values in multivariate data suitable for use with an electronic computer. *Journal of the Royal Statistical Society: Series B (Methodological)* **1960**, *22*, 302–306.
3. Pedregosa, F.; Varoquaux, G.; Gramfort, A.; Michel, V.; Thirion, B.; Grisel, O.; Blondel, M.; Prettenhofer, P.; Weiss, R.; Dubourg, V.; others. Scikit-learn: Machine learning in Python. *Journal of Machine Learning Research* **2011**, *12*, 2825–2830.
4. Breiman, L. Random forests. *Machine Learning* **2001**, *45*, 5–32.
5. Jurman, G.; Riccadonna, S.; Furlanello, C. A comparison of MCC and CEN error measures in multi-class prediction. *PloS one* **2012**, *7*.
6. Powers, D.M.W. Evaluation: From precision, recall and F-measure to ROC, informedness, markedness & correlation. *Journal of Machine Learning Technology* **2011**, *2*, 37–63.
7. Shi, L.; Campbell, G.; Jones, W.D.; Campagne, F.; Wen, Z.; Walker, S.J.; Su, Z.; Chu, T.M.; Goodsaid, F.M.; Pusztai, L.; others. The MicroArray Quality Control (MAQC)-II study of common practices for the development and validation of microarray-based predictive models. *Nature Biotechnology* **2010**, *28*, 827.
8. Jurman, G.; Riccadonna, S.; Visintainer, R.; Furlanello, C. Algebraic comparison of partial lists in bioinformatics. *PloS one* **2012**, *7*.
9. Huber, P.J. *Robust statistics*; Vol. 523, John Wiley & Sons, 2004.
